# Supplementary material
Source: publisher figshare collection journal article supplement (https://tandf.figshare.com/ndownloader/files/15616355)
Supplement: Supplementary file 1 [file 15616355]

Facile, mild and efficient synthesis of azines using phosphonic dihydrazide

Rizk E. Khidre,1,2 Hanan A. Mohamed,3,4 Benson M. Kariuki,5 and Gamal A. El-Hiti6,*

1Chemical Industries Division, National Research Centre, Dokki, 12622, Giza, Egypt

2Chemistry Department, Faculty of Science, Jazan University, Jazan, Saudi Arabia

3Applied Organic Chemistry Department, National Research Center, Dokki, 12622 Giza, Egypt

4Department of Chemistry, College of Science and Humanities, Shaqra University, Duwadimi, Saudi Arabia

5School of Chemistry, Cardiff University, Main Building, Park Place, Cardiff CF10 3AT, UK

6Department of Optometry, College of Applied Medical Sciences, King Saud University, P.O. Box 10219, Riyadh 11433, Saudi Arabia

E-mail: [gelhiti@ksu.edu.sa](mailto:gelhiti@ksu.edu.sa); ORCID: 0000-0001-6675-3126

**Supplemental Materials**

**Table S 1: Crystal Structure and Data Refinement Parameters for Compound 3c.**

| **Compound** | **3c** |
| --- | --- |
| Formula | C18H16Cl4N6 |
| Formula weight | 458.17 |
| Temperature / K | 296(2) |
| Wavelength / Å | 0.71073 |
| Crystal system | Triclinic |
| Space group | Pī |
| a / Å | 3.9485(4) |
| b / Å | 5.9999(9) |
| c / Å | 20.956(3) |
|  | 86.279(11). |
|  | 86.751(9) |
|  | 89.561(10) |
| V / Å3 | 494.61(11) |
| Z | 1 |
| Dcalc / Mgm-3 | 1.538 |
| μ (mm-1) | 0.616 |
| Crystal size / mm3 | 0.218 x 0.115 x 0.104 |
| Reflections collected | 3847 |
| Independent | 2275 |
| R(int) | 0.0185 |
| Goodness-of-fit on F2 | 1.063 |
| R1 [I>2σ(I)] | 0.0434 |
| wR2 [I>2σ(I)] | 0.0964 |
| R1 (all data) | 0.0616 |
| wR2 (all data) | 0.1071 |
| Extinction coefficient | n/a |
| Largest diff. peak, hole / e.Å-3 | 0.204, -0.232 |

**Table S 2: Crystal Structure and Data Refinement Parameters for Compound 3d.**

| **Compound** | **3d** |
| --- | --- |
| Formula | C18H16Br2Cl2N6 |
| Formula weight | 547.09 |
| Temperature / K | 296(2) |
| Wavelength / Å | 1.54184 |
| Crystal system | Monoclinic |
| Space group | P21/n |
| a / Å | 4.0227(2) |
| b / Å | 5.8986(3) |
| c / Å | 42.9459(14) |
|  | 90 |
|  | 89.732(4) |
|  | 90 |
| V / Å3 | 1019.02(8) |
| Z | 2 |
| Dcalc / Mgm-3 | 1.783 |
| μ (mm-1) | 7.605 |
| Crystal size / mm3 | 0.117 x 0.102 x 0.061 |
| Reflections collected | 6382 |
| Independent | 2023 |
| R(int) | 0.0350 |
| Goodness-of-fit on F2 | 1.095 |
| R1 [I>2σ(I)] | 0.0445 |
| wR2 [I>2σ(I)] | 0.1154 |
| R1 (all data) | 0.0510 |
| wR2 (all data) | 0.1210 |
| Extinction coefficient | n/a |
| Largest diff. peak, hole / e.Å-3 | 0.461, -0.391 |

**Table S 3: Crystal Structure and Data Refinement Parameters for Compound 5b.**

| **Compound** | **5b** |
| --- | --- |
| Formula | C30H26Br2N6S2 |
| Formula weight | 694.51 |
| Temperature / K | 293(2) |
| Wavelength / Å | 0.71073 |
| Crystal system | Orthorhombic |
| Space group | Pbcn |
| a / Å | 23.2644(18) |
| b / Å | 9.9839(8) |
| c / Å | 12.7550(8) |
|  | 90 |
|  | 90 |
|  | 90 |
| V / Å3 | 2962.6(4) |
| Z | 4 |
| Dcalc / Mgm-3 | 1.557 |
| μ (mm-1) | 2.909 |
| Crystal size / mm3 | 0.476 x 0.100 x 0.065 |
| Reflections collected | 12975 |
| Independent | 3734 |
| R(int) | 0.0404 |
| Goodness-of-fit on F2 | 1.066 |
| R1 [I>2σ(I)] | 0.0493 |
| wR2 [I>2σ(I)] | 0.1174 |
| R1 (all data) | 0.1036 |
| wR2 (all data) | 0.1425 |
| Extinction coefficient | n/a |
| Largest diff. peak, hole / e.Å-3 | 0.550, -0.821 |

**Table S 4: Crystal Structure and Data Refinement Parameters for Compound 10a.**

| **Compound** | **10a** |
| --- | --- |
| Formula | C20H16N2O2 |
| Formula weight | 316.35 |
| Temperature / K | 296(2) |
| Wavelength / Å | 0.71073 |
| Crystal system | Monoclinic |
| Space group | C2/c |
| a / Å | 19.6760(9) |
| b / Å | 6.3340(2) |
| c / Å | 25.3640(11) |
|  | 90 |
|  | 96.466(4) |
|  | 90 |
| V / Å3 | 3141.0(2) |
| Z | 8 |
| Dcalc / Mgm-3 | 1.338 |
| μ (mm-1) | 0.088 |
| Crystal size / mm3 | 0.304 x 0.180 x 0.117 |
| Reflections collected | 13456 |
| Independent | 3916 |
| R(int) | 0.0289 |
| Goodness-of-fit on F2 | 1.076 |
| R1 [I>2σ(I)] | 0.0514 |
| wR2 [I>2σ(I)] | 0.1356 |
| R1 (all data) | 0.0642 |
| wR2 (all data) | 0.1469 |
| Extinction coefficient | 0.0012(3) |
| Largest diff. peak, hole / e.Å-3 | 0.203, -0.166 |

**Table S 5: Crystal Structure and Data Refinement Parameters for Compound 10b.**

| **Compound** | **10b** |
| --- | --- |
| Formula | C20H18N4 |
| Formula weight | 314.38 |
| Temperature / K | 296(2) |
| Wavelength / Å | 0.71073 |
| Crystal system | Monoclinic |
| Space group | P21/c |
| a / Å | 7.3795(3) |
| b / Å | 10.3392(4) |
| c / Å | 21.6783(10) |
|  | 90 |
|  | 98.336(4) |
|  | 90 |
| V / Å3 | 1636.54(12) |
| Z | 4 |
| Dcalc / Mgm-3 | 1.276 |
| μ (mm-1) | 0.078 |
| Crystal size / mm3 | 0.319 x 0.183 x 0.142 |
| Reflections collected | 13592 |
| Independent | 4092 |
| R(int) | 0.0310 |
| Goodness-of-fit on F2 | 1.062 |
| R1 [I>2σ(I)] | 0.0551 |
| wR2 [I>2σ(I)] | 0.1457 |
| R1 (all data) | 0.0766 |
| wR2 (all data) | 0.1626 |
| Extinction coefficient | n/a |
| Largest diff. peak, hole / e.Å-3 | 0.194, -0.193 |

**Table S 6: Crystal Structure and Data Refinement Parameters for Compound 12.**

| **Compound** | **12** |
| --- | --- |
| Formula | C16H10N4O2 |
| Formula weight | 290.28 |
| Temperature / K | 296(2) |
| Wavelength / Å | 1.54184 |
| Crystal system | Trigonal |
| Space group | R3̅ H |
| a / Å | 24.7517(5) |
| b / Å | 24.7517(5) |
| c / Å | 5.64860(10) |
|  | 90 |
|  | 90 |
|  | 120 |
| V / Å3 | 2996.96(13) |
| Z | 9 |
| Dcalc / Mgm-3 | 1.448 |
| μ (mm-1) | 0.824 |
| Crystal size / mm3 | 0.553 x 0.052 x 0.039 |
| Reflections collected | 6861 |
| Independent | 1336 |
| R(int) | 0.0309 |
| Goodness-of-fit on F2 | 1.069 |
| R1 [I>2σ(I)] | 0.0406 |
| wR2 [I>2σ(I)] | 0.1129 |
| R1 (all data) | 0.0441 |
| wR2 (all data) | 0.1175 |
| Extinction coefficient | n/a |
| Largest diff. peak, hole / e.Å-3 | 0.271, -0.177 |

**Table S 7: Bond lengths [Å] and selected angles [°] of compound 3c.**

| C(1)-C(2) 1.379(3) | C(1)-C(6) 1.384(3) |
| --- | --- |
| C(1)-N(1) 1.390(3) | C(2)-C(3) 1.380(3) |
| C(3)-C(4) 1.377(3) | C(4)-C(5) 1.370(3) |
| C(4)-Cl(1) 1.741(2) | C(5)-C(6) 1.375(3) |
| C(7)-N(2) 1.270(2) | C(7)-C(8) 1.465(3) |
| C(7)-Cl(2) 1.742(2) | C(8)-N(3) 1.283(3) |
| C(8)-C(9) 1.490(3) | N(1)-N(2) 1.340(2) |
| N(3)-N(3)#1 1.402(3) | N(2)-C(7)-C(8) 120.87(18) |
| N(2)-C(7)-Cl(2) 121.14(15) | C(8)-C(7)-Cl(2) 117.99(15) |
| N(3)-C(8)-C(7) 116.29(18) | N(3)-C(8)-C(9) 126.13(18) |
| C(7)-C(8)-C(9) 117.57(17) | N(2)-N(1)-C(1) 120.32(17) |
| C(7)-N(2)-N(1) 120.60(17) | C(8)-N(3)-N(3)#1 112.9(2) |
| #1 -x+1,-y+1,-z | |

**Table S 8: Bond lengths [Å] and selected angles [°] of compound 3d.**

| C(1)-C(6) 1.385(6) | C(1)-C(2) 1.391(5) |
| --- | --- |
| C(1)-N(1) 1.396(5) | C(2)-C(3) 1.379(6) |
| C(3)-C(4) 1.369(6) | C(4)-C(5) 1.386(5) |
| C(4)-Br(1) 1.908(4) | C(5)-C(6) 1.378(5) |
| C(7)-N(2) 1.265(5) | C(7)-C(8) 1.470(5) |
| C(7)-Cl(1) 1.749(4) | C(8)-N(3) 1.284(5) |
| C(8)-C(9) 1.493(6) | N(1)-N(2) 1.334(4) |
| N(3)-N(3)#1 1.410(6) | N(2)-C(7)-C(8) 121.2(3) |
| N(2)-C(7)-Cl(1) 121.3(3) | C(8)-C(7)-Cl(1) 117.5(3) |
| N(3)-C(8)-C(7) 116.2(3) | N(3)-C(8)-C(9) 126.5(3) |
| C(7)-C(8)-C(9) 117.2(3) | N(2)-N(1)-C(1) 120.4(3) |
| N(2)-N(1)-H(1) 119.8 | C(8)-N(3)-N(3)#1 112.5(4) |
| #1 -x-1,-y,-z | |

**Table S 9: Bond lengths [Å] and selected angles [°] of compound 5b.**

| C(1)-N(1) 1.383(4) | C(1)-C(2) 1.384(5) |
| --- | --- |
| C(1)-C(6) 1.392(4) | C(2)-C(3) 1.371(4) |
| C(3)-C(4) 1.380(5) | C(4)-C(5) 1.371(5) |
| C(4)-Br(1) 1.901(3) | C(5)-C(6) 1.372(5) |
| C(7)-N(2) 1.281(4) | C(7)-C(8) 1.470(4) |
| C(7)-S(1) 1.789(3) | C(8)-N(3) 1.283(4) |
| C(8)-C(9) 1.493(4) | C(10)-C(11) 1.380(5) |
| C(10)-C(15) 1.388(5) | C(10)-S(1) 1.769(3) |
| C(11)-C(12) 1.364(5) | C(12)-C(13) 1.366(6) |
| C(13)-C(14) 1.374(6) | C(14)-C(15) 1.378(5) |
| N(1)-N(2) 1.339(4) | N(3)-N(3)#1 1.397(5) |
| N(2)-C(7)-C(8) 117.6(3) | N(2)-C(7)-S(1) 122.7(2) |
| C(8)-C(7)-S(1) 119.7(2) | N(3)-C(8)-C(7) 116.4(3) |
| N(3)-C(8)-C(9) 125.0(3) | C(7)-C(8)-C(9) 118.6(3) |
| N(2)-N(1)-C(1) 120.1(3) | C(7)-N(2)-N(1) 120.6(3) |
| C(8)-N(3)-N(3)#1 113.1(3) | C(10)-S(1)-C(7) 101.63(15) |
| #1 -x+2,-y+1,-z-1 | |

**Table S 10: Bond lengths [Å] and selected angles [°] of compound 10a.**

| C(1)-C(2) 1.343(2) | C(1)-O(1) 1.378(2) |
| --- | --- |
| C(1)-C(9) 1.454(2) | C(2)-C(3) 1.417(2) |
| C(3)-C(4) 1.392(2) | C(3)-C(5) 1.396(2) |
| C(4)-C(8) 1.377(2) | C(4)-O(1) 1.3767(18) |
| C(5)-C(6) 1.375(3) | C(6)-C(7) 1.394(3) |
| C(7)-C(8) 1.375(3) | C(9)-N(1) 1.284(2) |
| C(9)-C(10) 1.500(2) | C(11)-C(12) 1.497(2) |
| C(12)-N(2) 1.285(2) | C(12)-C(13) 1.455(2) |
| C(13)-C(14) 1.351(2) | C(13)-O(2) 1.3816(18) |
| C(14)-C(15) 1.426(2) | C(15)-C(16) 1.389(2) |
| C(15)-C(17) 1.399(2) | C(16)-O(2) 1.3733(18) |
| C(16)-C(20) 1.381(2) | C(17)-C(18) 1.375(3) |
| C(18)-C(19) 1.386(3) | C(19)-C(20) 1.380(3) |
| N(1)-N(2) 1.3933(18) | N(1)-C(9)-C(1) 117.38(15) |
| N(1)-C(9)-C(10) 126.19(15) | C(1)-C(9)-C(10) 116.38(14) |
| N(2)-C(12)-C(13) 117.67(14) | N(2)-C(12)-C(11) 125.25(14) |
| C(13)-C(12)-C(11) 117.05(14) | C(14)-C(13)-O(2) 111.24(13) |
| C(14)-C(13)-C(12) 130.87(15) | O(2)-C(13)-C(12) 117.84(13) |
| C(9)-N(1)-N(2) 114.57(14) | C(12)-N(2)-N(1) 113.90(13) |

**Table S 11: Bond lengths [Å] and selected angles [°] of compound 10b.**

| C(1)-N(1) 1.357(3) | C(1)-C(2) 1.372(3) |
| --- | --- |
| C(2)-C(3) 1.444(3) | C(2)-C(9) 1.452(2) |
| C(3)-C(5) 1.395(3) | C(3)-C(4) 1.405(3) |
| C(4)-N(1) 1.373(3) | C(4)-C(8) 1.390(3) |
| C(5)-C(6) 1.379(3) | C(6)-C(7) 1.391(3) |
| C(7)-C(8) 1.365(3) | C(9)-N(2) 1.292(2) |
| C(9)-C(10) 1.500(2) | C(11)-N(3) 1.294(2) |
| C(11)-C(14) 1.453(2) | C(11)-C(12) 1.502(2) |
| C(13)-N(4) 1.357(2) | C(13)-C(14) 1.376(2) |
| C(14)-C(15) 1.444(2) | C(15)-C(17) 1.400(2) |
| C(15)-C(16) 1.408(2) | C(16)-N(4) 1.374(2) |
| C(16)-C(20) 1.396(2) | C(17)-C(18) 1.383(3) |
| C(18)-C(19) 1.397(3) | C(19)-C(20) 1.375(3) |
| N(2)-N(3) 1.405(2) | N(2)-C(9)-C(2) 116.85(16) |
| N(2)-C(9)-C(10) 124.40(17) | C(2)-C(9)-C(10) 118.74(17) |
| N(3)-C(11)-C(14) 117.02(15) | N(3)-C(11)-C(12) 123.71(16) |
| C(14)-C(11)-C(12) 119.27(15) | C(1)-N(1)-C(4) 109.72(17) |
| C(9)-N(2)-N(3) 114.22(14) | C(11)-N(3)-N(2) 113.36(14) |

**Table S 12: Bond lengths [Å] and selected angles [°] of compound 12.**

| C(1)-O(1) 1.2183(17) | C(1)-N(1) 1.3573(17) |
| --- | --- |
| C(1)-C(2) 1.5225(18) | C(2)-N(2) 1.2870(17) |
| C(2)-C(3) 1.4558(18) | C(3)-C(5) 1.388(2) |
| C(3)-C(4) 1.4044(18) | C(4)-C(8) 1.3758(19) |
| C(4)-N(1) 1.3991(17) | C(5)-C(6) 1.385(2) |
| C(6)-C(7) 1.386(2) | C(7)-C(8) 1.391(2) |
| N(2)-N(2)#1 1.404(2) | C(2)-N(2)-N(2)#1 111.86(14) |
| #1 -x+1,-y,-z | |

Figure S 1: 1H NMR spectrum of compound **3a**

Figure S 2: 13C NMR Spectrum of compound **3a**

Figure S 3: 1H NMR Spectrum of compound **5b**

Figure S 4: 13C NMR Spectrum of compound **5b**

Figure S 5: 1H NMR Spectrum of compound **6a**

Figure S 6: 13C NMR Spectrum of compound **6a**

Figure S 7: 1H NMR Spectrum of compound **7b**

Figure S 8: 13C NMR Spectrum of compound **7b**

Figure S 9: 1H NMR Spectrum of compound **10e**

Figure S 10: 1H NMR Spectrum of compound **10e**


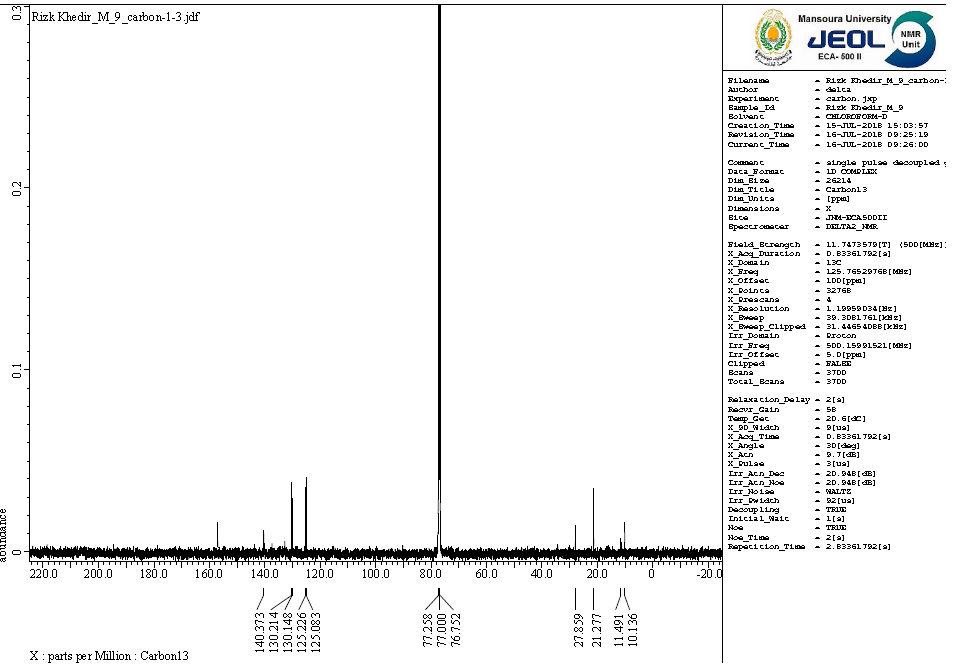


Figure S 11: 13C NMR Spectrum of compound **10e**
